# Supplementary material for: A homobimetallic complex of chromium(0) with a σ-borane component
Source: Royal Society of Chemistry journal article supplement (doi:10.1039/c1dt10584a), 2011-01-01
Supplement: c1dt10584a.pdf [file c1dt10584a.pdf]

**Electronic Supplementary Information**

**A Homobimetallic Complex of Chromium(0) with a  $\sigma$ -borane Component**

Barun Bera, Yogesh P. Patil, Munirathinam Nethaji and Balaji R. Jagirdar\*

Department of Inorganic & Physical Chemistry, Indian Institute of Science, Bangalore 560 012,  
India

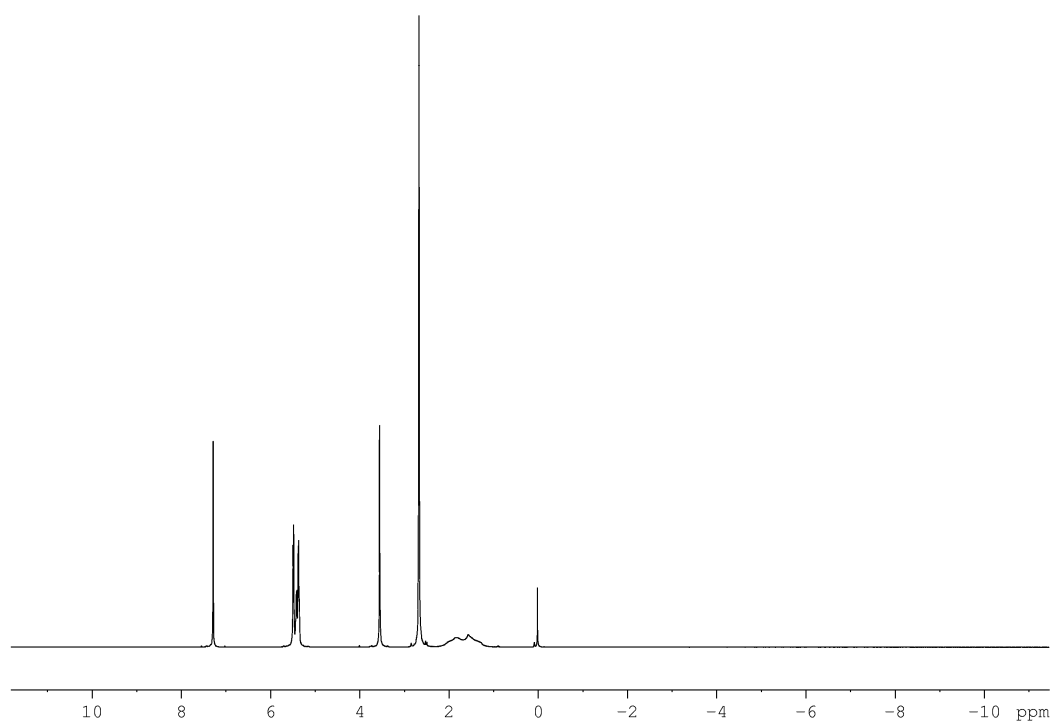

**Figure S1.**  $^1\text{H}$  NMR spectrum ( $\text{CDCl}_3$ , 293 K) of  $(\eta^6\text{-C}_6\text{H}_5\text{CH}_2\text{NMe}_2\cdot\text{BH}_3)\text{Cr}(\text{CO})_3$  (**2**)

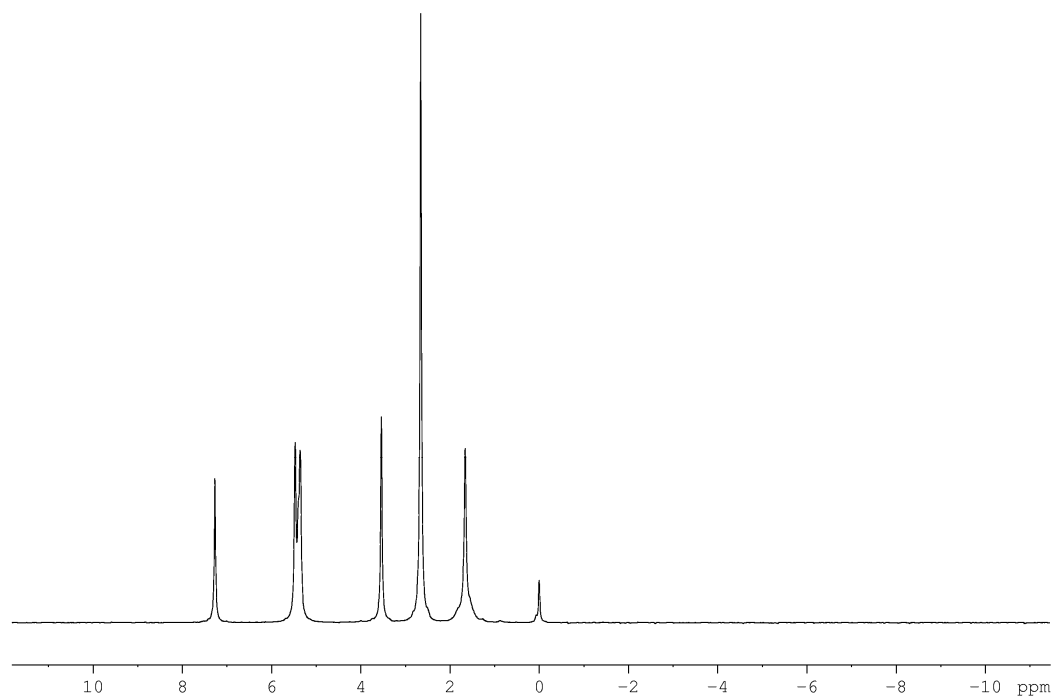

**Figure S2.**  $^1\text{H}\{^{11}\text{B}\}$  NMR spectrum( $\text{CDCl}_3$ , 293 K) of  $(\eta^6\text{-C}_6\text{H}_5\text{CH}_2\text{NMe}_2\cdot\text{BH}_3)\text{Cr}(\text{CO})_3$  (**2**)

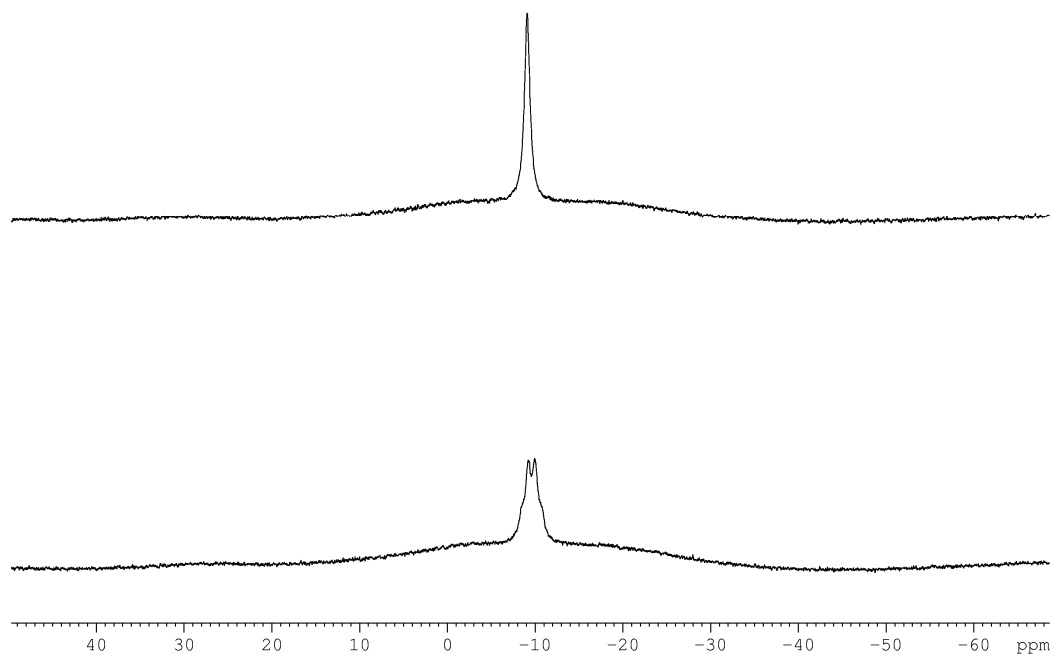

**Figure S3.**  $^{11}\text{B}$  (bottom) and  $^{11}\text{B}\{^1\text{H}\}$  (top) NMR spectra ( $\text{CDCl}_3$ , 293 K) of ( $\eta^6$ - $\text{C}_6\text{H}_5\text{CH}_2\text{NMe}_2\cdot\text{BH}_3$ ) $\text{Cr}(\text{CO})_3$  (**2**)

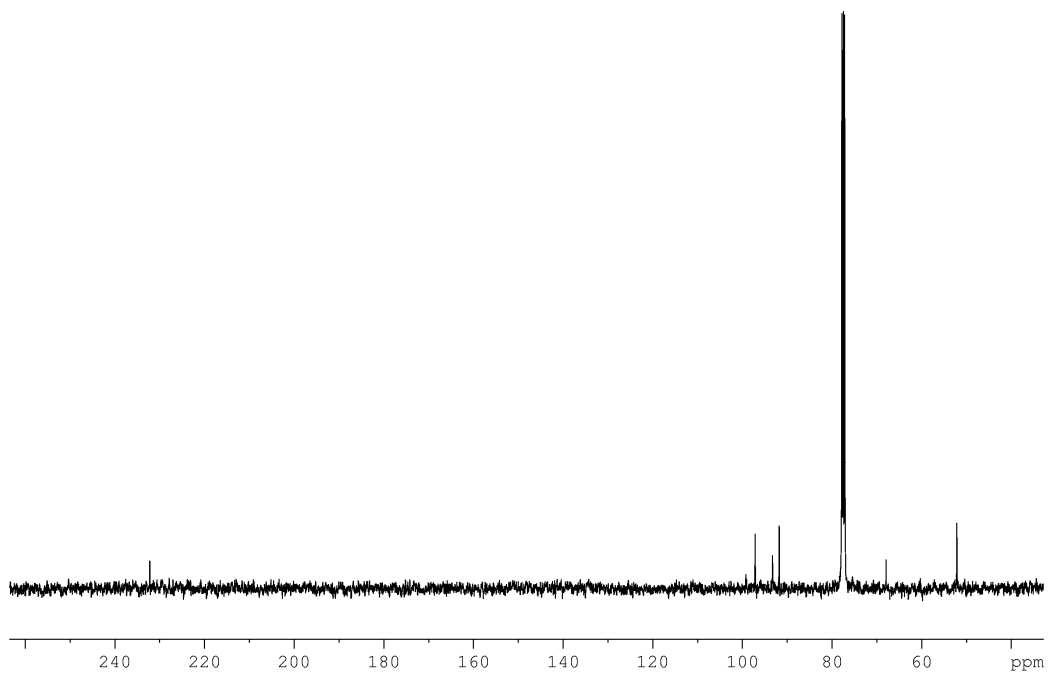

**Figure S4.**  $^{13}\text{C}$  NMR spectrum ( $\text{CDCl}_3$ , 293 K) of  $(\eta^6\text{-C}_6\text{H}_5\text{CH}_2\text{NMe}_2\cdot\text{BH}_3)\text{Cr}(\text{CO})_3$  (**2**)

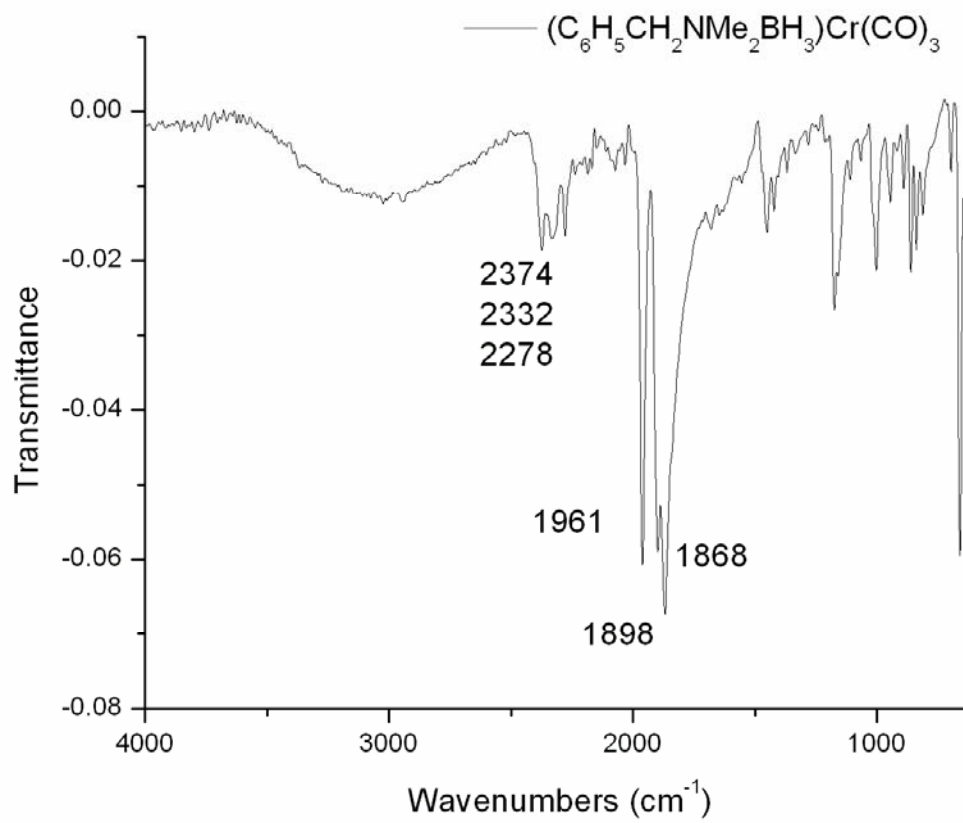

**Figure S5.** IR spectrum of  $(\eta^6\text{-C}_6\text{H}_5\text{CH}_2\text{NMe}_2\text{BH}_3)\text{Cr}(\text{CO})_3$  (**2**)

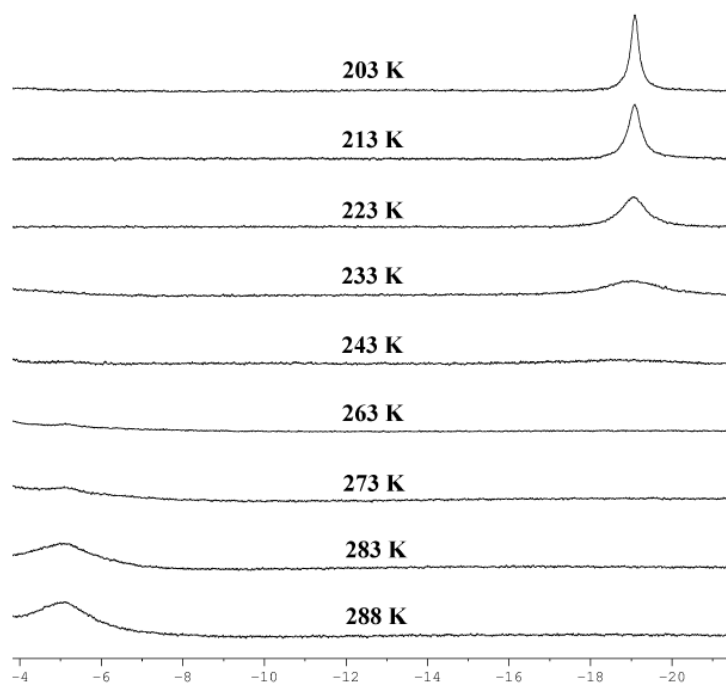

**Figure S6.** VT <sup>1</sup>H NMR spectral stack plot of the  $\sigma$ -borane region of  $(\eta^1-(\eta^6-C_6H_5CH_2NMe_2 \cdot BH_2-H))Cr(CO)_2$  (**3**) in toluene-*d*<sub>8</sub>

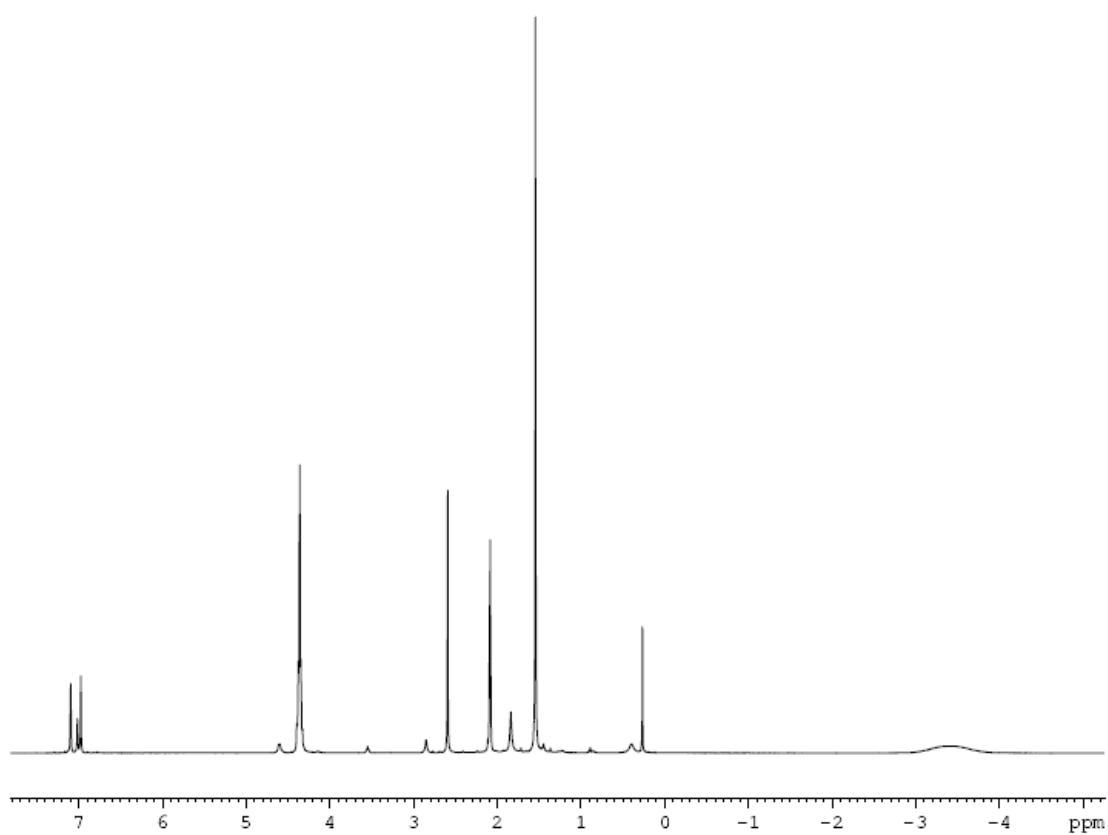

**Figure S7.**  $^1\text{H}$  NMR spectrum (toluene- $d_8$ , 288 K) of ( $\eta^6$ - $\text{C}_6\text{H}_5\text{CH}_2\text{NMe}_2 \cdot \text{BH}_2\text{HCr}(\text{CO})_5\text{Cr}(\text{CO})_3$ ) (**4**)

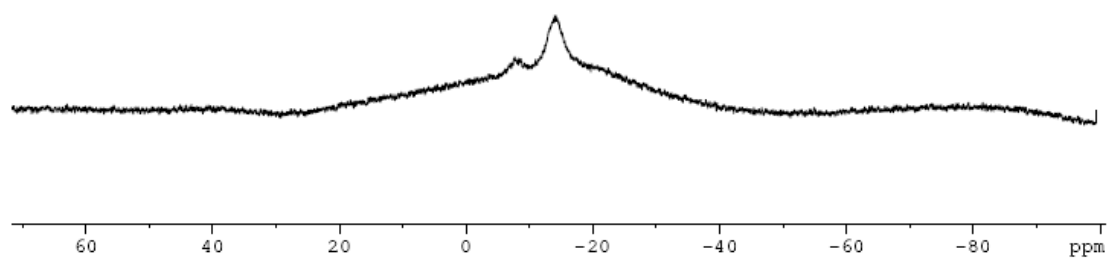

**Figure S8.**  $^{11}\text{B}$  NMR spectrum (toluene- $d_8$ , 288 K) of ( $\eta^6$ - $\text{C}_6\text{H}_5\text{CH}_2\text{NMe}_2\cdot\text{BH}_2\text{HCr}(\text{CO})_5\text{Cr}(\text{CO})_3$ ) (**4**)



### $^{13}\text{C}$ NMR spectrum of **4**

In the  $^{13}\text{C}$  NMR spectrum of the  $\sigma$ -borane complex **4**, recorded at 263 K, two carbonyl signals at  $\delta$  216 ppm and  $\delta$  224 ppm were assigned to the *cis*- and *trans*-CO ligands respectively, of the  $\text{Cr}(\text{CO})_5$  unit. The  $-\text{NMe}_2$  group appears at  $\delta$  50.3 ppm which was upfield shifted from that of the starting complex **2**. The  $-\text{CH}_2-$  group appears at  $\delta$  67.1 ppm. In the  $^{11}\text{B}$  NMR spectrum of the  $\sigma$ -borane complex **4**, the presence of a broad signal at  $\delta$   $-14.9$  ppm, which is about 6 ppm upfield shifted from that of the starting complex **2**, fulfils the typical  $^{11}\text{B}$  NMR spectral characteristics of a  $\sigma$ -borane complex.

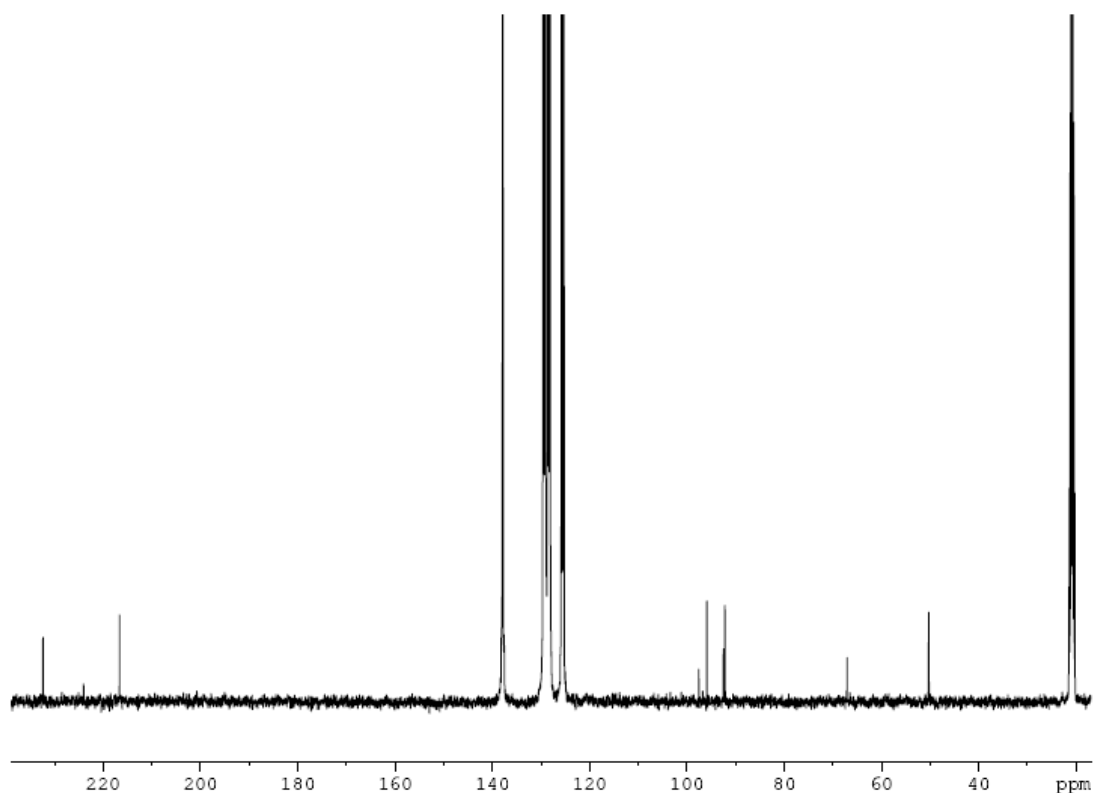

**Figure S9.**  $^{13}\text{C}$  NMR spectrum (toluene- $d_8$ , 288 K) of ( $\eta^6$ - $\text{C}_6\text{H}_5\text{CH}_2\text{NMe}_2 \cdot \text{BH}_2\text{HCr}(\text{CO})_5$ ) $\text{Cr}(\text{CO})_3$  (**4**)

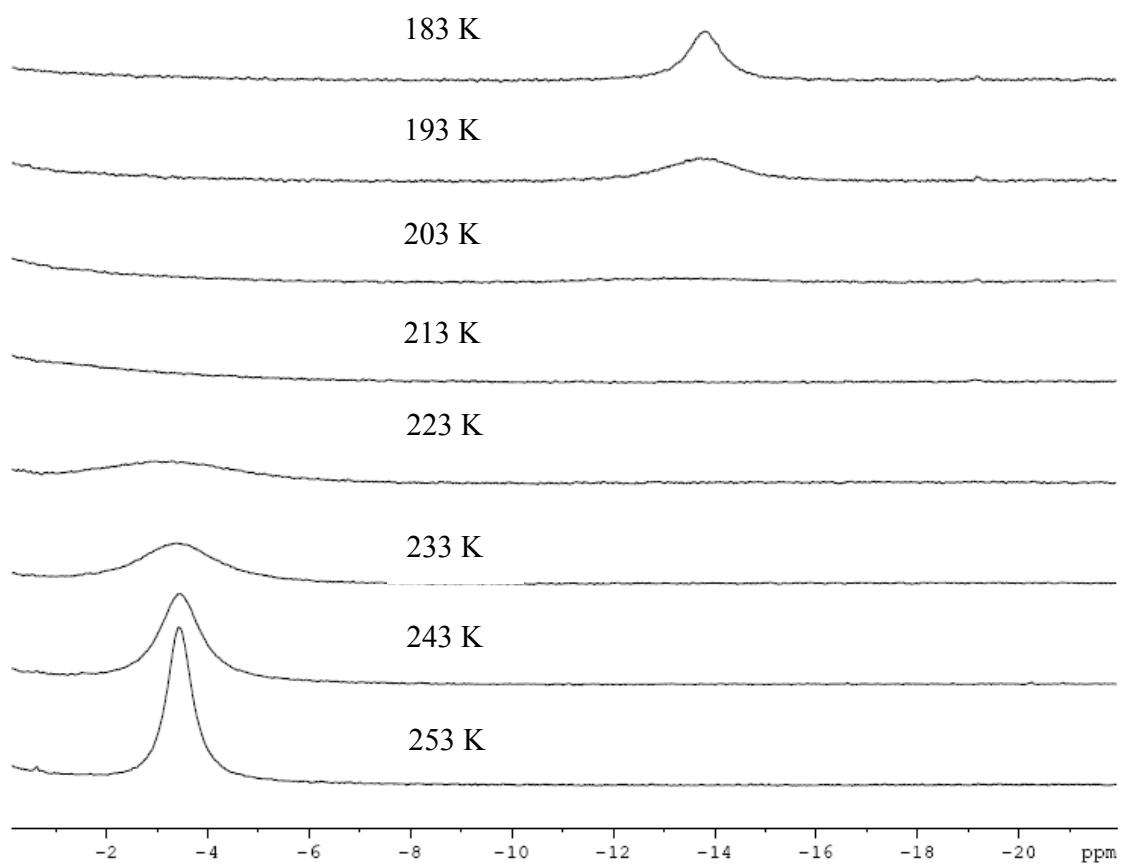

**Figure S10.** Variable temperature  $^1\text{H}$  NMR spectral stack plot (toluene- $d_8$ ) (high field region) of  $(\eta^6\text{-C}_6\text{H}_5\text{CH}_2\text{NMe}_2\cdot\text{BH}_2\text{HCr(CO)}_5)\text{Cr(CO)}_3$  (**4**)

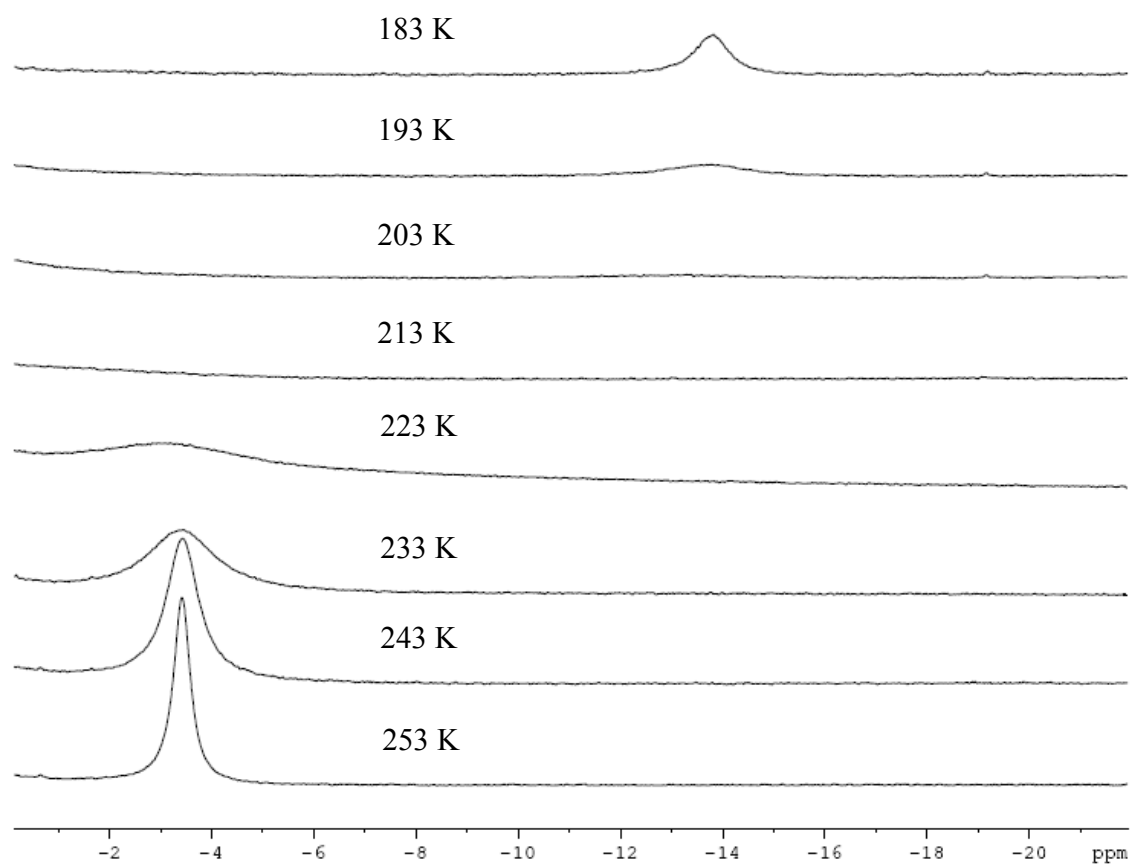

**Figure S11.** VT  $^1\text{H}\{^{11}\text{B}\}$  NMR spectral stack plot ( $\text{toluene-}d_8$ ) (high field region) of  $(\eta^6\text{-C}_6\text{H}_5\text{CH}_2\text{NMe}_2\cdot\text{BH}_2\text{HCr(CO)}_5)\text{Cr(CO)}_3$  (**4**)

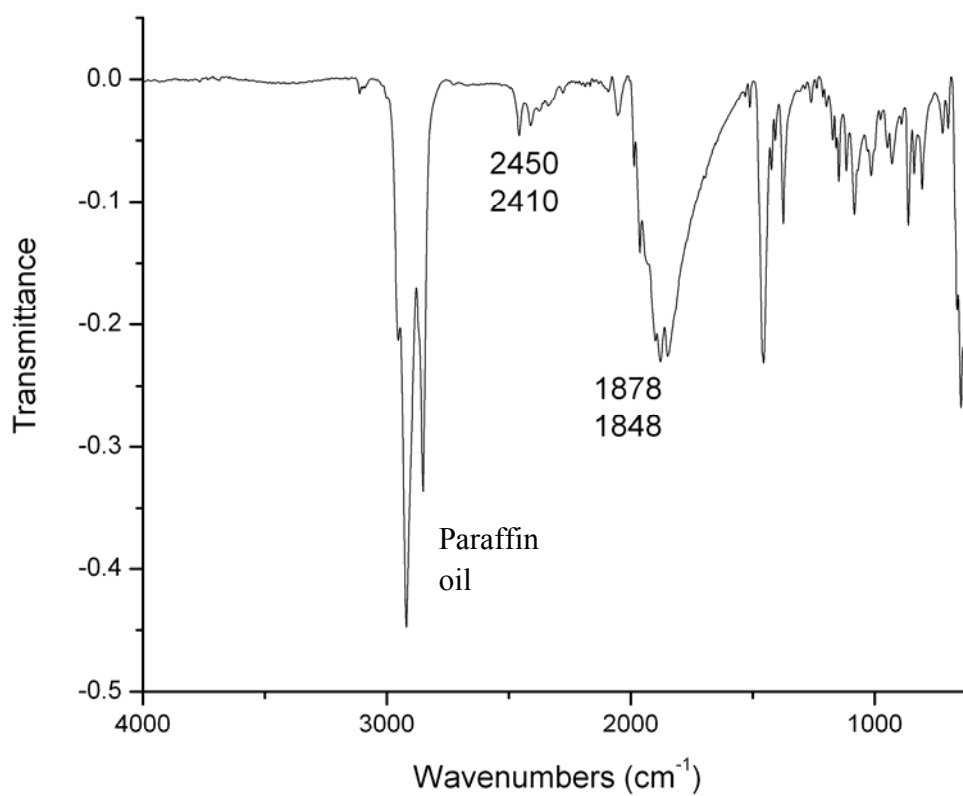

**Figure S12.** IR spectrum of ( $\eta^6$ -C<sub>6</sub>H<sub>5</sub>CH<sub>2</sub>NMe<sub>2</sub>·BH<sub>2</sub>HCr(CO)<sub>5</sub>)Cr(CO)<sub>3</sub> (**4**)

**Table S1.** List of Cr–H bond lengths (Å) and Cr–H–B bond angles (°) of  $\sigma$ -borane complexes of chromium(0) reported to date

| Complex                                                                        | Cr–H Length (Å) | Angle (Cr–H–B) (°) |
|--------------------------------------------------------------------------------|-----------------|--------------------|
| $[\text{HCr}(\text{CO})_5][\text{PPh}_4]^1$                                    | 1.66(5)         |                    |
| $(\text{OC})_5\text{Cr}(\eta^1\text{-B}_2\text{H}_4 \cdot 2\text{PMe}_3)^2$    | 1.76(8)         | 141(8)             |
| $(\text{OC})_5\text{Cr}(\eta^1\text{-HBHPh} \cdot \text{PMe}_3)^3$             | 1.77(2)         | 133(2)             |
| $(\text{OC})_5\text{Cr}(\eta^1\text{-HBHMe} \cdot \text{PMe}_3)^3$             | 1.78(3)         | 138.4(16)          |
| $(\text{OC})_4\text{Cr}(\eta^1\text{-HBH}_2 \cdot \text{dppm})^4$              | 1.78(3)         | 136(3)             |
| $(\text{OC})_5\text{Cr}(\eta^1\text{-HBH}_2 \cdot \text{NMe}_3)^5$             | 1.83            | 158                |
| $(\text{OC})_5\text{Cr}(\eta^1\text{-HBH}_2 \cdot \text{PMe}_3)^5$             | 1.94(10)        | 130(8)             |
| $(\text{OC})_3\text{Cr}(\text{HC}_6\text{H}_{10}\text{PCy}_2)(\text{PCy}_3)^6$ | 2.240(1)        |                    |

## References

1. M. Y. Darensbourg, R. Bau, M. W. Marks, R. R. Burch, Jr., J. C. Deaton and S. Slater, *J. Am. Chem. Soc.*, 1982, **104**, 6961.
2. M. Shimoi, K. Katoh and H. Ogino, *J. Chem. Soc., Chem. Commun.*, 1990, 811.
3. Y. Kawano, K. Yamaguchi, S. -y. Miyake, T. Kakizawa and M. Shimoi, *Chem. Eur. J.*, 2007, **13**, 6920.
4. N. Merle, G. Koicok-Köhn, M. F. Mahon, C. G. Frost, G. D. Ruggiero, A. S. Weller and M. C. Willis, *Dalton Trans.*, 2004, 3883.
5. M. Shimoi, S. -i. Nagai, M. Ichikawa, Y. Kawano, K. Katoh, M. Uruichi and H. Ogino, *J. Am. Chem. Soc.*, 1999, **121**, 11704.
6. K. Zhang, A. A. Gonzalez, S. L. Mukerjee, S.-J. Chou, C. D. Hoff, K. A. Kubat-Martin, D. Barnhart and G. J. Kubas, *J. Am. Chem. Soc.*, 1991, **113**, 9170.
